# Supplementary material
Source: PubMed Central journal article supplement (PMC6510644)
Supplement: NIHMS1512119-supplement-2.pdf [file NIHMS1512119-supplement-2.pdf]

Figure S2

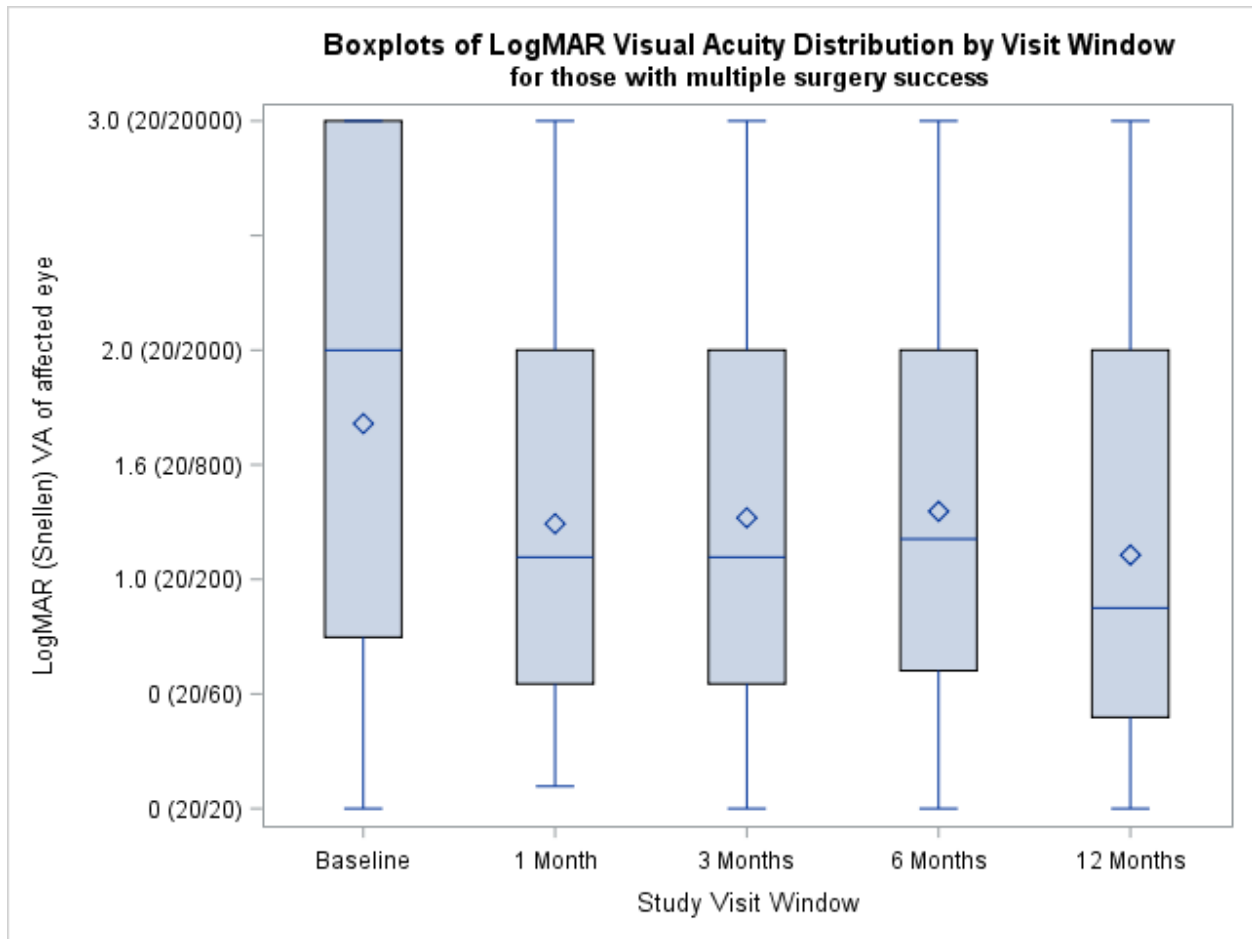

Boxplots showing range, 25<sup>th</sup> – 75<sup>th</sup> percentile (box), mean (diamond), and median (middle line) for eyes with multiple surgery success at baseline, 1 month, 3 months, 6 months, and 12 months.
