# Supplementary material
Source: PubMed Central journal article supplement (PMC6510644)
Supplement: NIHMS1512119-supplement-3.pdf [file NIHMS1512119-supplement-3.pdf]

**Table S1. Eyes with complete data at each follow-up<sup>1</sup>**

|           | No. Eyes | N with reattachment status known | N with LogMAR Visual Acuity <sup>2</sup> | N with any Visual Acuity <sup>3</sup> |
|-----------|----------|----------------------------------|------------------------------------------|---------------------------------------|
| Baseline  | 212      | n/a                              | 137                                      | 181                                   |
| 1 month   | 143      | 143                              | 110                                      | 122                                   |
| 3 months  | 161      | 161                              | 125                                      | 144                                   |
| 6 months  | 154      | 154                              | 121                                      | 141                                   |
| 12 months | 165      | 165                              | 125                                      | 155                                   |

---

<sup>1</sup> Not every patient was examined at each of the pre-specified time points during the first 12 months after surgery. In some cases, some post-operative care was provided by local referring physicians to lessen travel burdens. In addition, some examinations were performed under anesthesia and visual acuity data was not obtained. 67 patient eyes had complete data out to 12 months and 65 patient eyes missed only 1 visit, for a total of 132/212 eyes (62%) that missed 1 visit or less

<sup>2</sup> Note this column includes all eyes, not just eyes with surgical success. As a result, this column has more eyes than column 5 of table 4

<sup>3</sup> Includes those with VA measurements that are not convertible to logMAR (Blink to Light, Central-Steady-Maintained, Fix and Follow, Light Perception, and No Light Perception)
