# Supplementary material
Source: PubMed Central journal article supplement (PMC6510644)
Supplement: NIHMS1512119-supplement-4.pdf [file NIHMS1512119-supplement-4.pdf]

**Table S2. Patient Characteristics Based on Time of Last Follow Up**

|                               |        | <b>3 months<br/>(n=14 eyes)</b> | <b>6 months<br/>(n=18 eyes)</b> | <b>12 months<br/>(n=46 eyes)</b> | <b>More than 12 months<br/>(n=134)</b> | <b>p-value</b> |
|-------------------------------|--------|---------------------------------|---------------------------------|----------------------------------|----------------------------------------|----------------|
| <b>Outcomes</b>               |        |                                 |                                 |                                  |                                        |                |
| Multiple Surgery Success      |        | 8/14 (57%)                      | 14/18 (78%)                     | 39/46 (85%)                      | 105/134 (78%)                          | 0.26           |
| Initial Surgery Success       |        | 7/14 (50%)                      | 12/16 (75%)                     | 32/44 (73%)                      | 85/126 (67%)                           | 0.41           |
| Baseline LogMAR visual acuity |        | 1.6 (1.2), (n=9)                | 1.7 (1.3), (n=7)                | 1.5 (0.98), (n=30)               | 1.9 (1.0), (n=91)                      | 0.20           |
| <b>Demographics</b>           |        |                                 |                                 |                                  |                                        |                |
| Sex                           | Female | 7/14 (50%)                      | 5/18 (28%)                      | 11/46 (24%)                      | 30/134 (22%)                           | 0.67           |
|                               | Male   | 7/14 (50%)                      | 13/18 (72%)                     | 35/46 (76%)                      | 104/134 (78%)                          |                |
| Age group                     | 0-6    | 2/14 (14%)                      | 6/18 (33%)                      | 12/46 (26%)                      | 37/134 (28%)                           | 0.72           |
|                               | 7-12   | 4/14 (29%)                      | 5/18 (28%)                      | 13/46 (28%)                      | 34/134 (25%)                           |                |
|                               | 13-18  | 8/14 (57%)                      | 7/18 (39%)                      | 21/46 (46%)                      | 63/134 (47%)                           |                |
| <b>Predisposing factor</b>    |        |                                 |                                 |                                  |                                        |                |
| Stickler syndrome             |        | 1/14 (7%)                       | 2/18 (11%)                      | 8/46 (17%)                       | 28/134 (21%)                           | 0.82           |
| Marfan syndrome               |        | 0/14 (0%)                       | 0/18 (0%)                       | 3/46 (7%)                        | 4/134 (3%)                             | 0.81           |
| Myopia                        |        | 3/14 (21%)                      | 5/18 (28%)                      | 14/46 (30%)                      | 49/134 (37%)                           | 0.58           |
| Prematurity                   |        | 3/14 (21%)                      | 2/18 (11%)                      | 3/46 (7%)                        | 20/134 (15%)                           | 0.093          |
| Treated ROP                   |        | 1/14 (7%)                       | 1/18 (6%)                       | 3/46 (7%)                        | 13/134 (10%)                           | 0.50           |
| FEVR                          |        | 1/14 (7%)                       | 0/18 (0%)                       | 1/46 (2%)                        | 3/134 (2%)                             | 0.50           |
| Penetrating trauma            |        | 1/14 (7%)                       | 4/18 (22%)                      | 12/46 (26%)                      | 15/134 (11%)                           | 0.66           |
| Blunt trauma                  |        | 4/14 (29%)                      | 6/18 (33%)                      | 11/46 (24%)                      | 25/134 (19%)                           | 0.49           |
| Previous cataract surgery     |        | 0/14 (0%)                       | 3/18 (17%)                      | 8/46 (17%)                       | 21/134 (16%)                           | 0.94           |
| Previous glaucoma surgery     |        | 0/14 (0%)                       | 1/18 (6%)                       | 3/46 (7%)                        | 3/134 (2%)                             | 0.49           |

|                             |            |                     |                    |                   |                    |      |
|-----------------------------|------------|---------------------|--------------------|-------------------|--------------------|------|
| Previous retinal Surgery    |            | 0/14 (0%)           | 1/18 (6%)          | 7/46 (15%)        | 21/134 (16%)       | 0.83 |
| Weeks of symptoms           |            | 18.6 (45.9), (n=11) | 7.9 (14.5), (n=14) | 4.4 (9.3), (n=32) | 6.8 (11.2), (n=81) | 0.66 |
|                             |            |                     |                    |                   |                    |      |
| <b>Examination findings</b> |            |                     |                    |                   |                    |      |
| Severity                    | Macula on  | 1/14 (7%)           | 1/18 (6%)          | 8/46 (17%)        | 9/134 (7%)         | 0.95 |
|                             | Macula off | 4/14 (29%)          | 3/18 (17%)         | 19/46 (41%)       | 38/134 (28%)       |      |
|                             | Total RD   | 9/14 (64%)          | 14/18 (78%)        | 19/46 (41%)       | 87/134 (65%)       |      |
