# Supplementary material
Source: PubMed Central journal article supplement (PMC6510644)
Supplement: NIHMS1512119-supplement-5.pdf [file NIHMS1512119-supplement-5.pdf]

**Table S3. Adjusted Visual Acuity Results for Eyes with Surgical Failure and Multiple Surgery Success<sup>1</sup>**

|           |                  |                          |                                          | Model Results  |                        |                  |                        |
|-----------|------------------|--------------------------|------------------------------------------|----------------|------------------------|------------------|------------------------|
|           |                  |                          |                                          | Failed Surgery |                        | Surgical Success |                        |
|           | No Visual Acuity | Non-LogMAR Visual Acuity | LogMAR Visual Acuity (Included in Model) | N Eyes         | Adjusted Mean (95% CI) | N Eyes           | Adjusted Mean (95% CI) |
| Baseline  | 31               | 44                       | 137                                      | 29             | 2.11 (1.79, 2.43)      | 108              | 1.80 (1.61, 1.99)      |
| 1 Month   | 21               | 12                       | 110                                      | 19             | 1.89 (1.55, 2.24)      | 91               | 1.36 (1.22, 1.50)      |
| 3 Months  | 17               | 19                       | 125                                      | 25             | 1.64 (1.36, 1.93)      | 100              | 1.29 (1.13, 1.44)      |
| 6 Months  | 13               | 20                       | 121                                      | 20             | 1.91 (1.57, 2.24)      | 101              | 1.26 (1.11, 1.42)      |
| 12 Months | 10               | 30                       | 125                                      | 20             | 2.10 (1.78, 2.42)      | 105              | 1.14 (0.99, 1.29)      |

<sup>1</sup> P-values for adjusted model: Visit:<0.0001, Multiple Surgery Success: 0.0002, Visit\*Multiple Surgery Success: 0.0003
