# Supplementary material
Source: PubMed Central journal article supplement (PMC6510644)
Supplement: NIHMS1512119-supplement-6.pdf [file NIHMS1512119-supplement-6.pdf]

**Table S4. Eyes with no VA data or non-logMAR data at each time point**

|           | No VA (EUA) | Favorable VA Measurements |     |     |    | Unfavorable VA Measurements |    |     |        |       |
|-----------|-------------|---------------------------|-----|-----|----|-----------------------------|----|-----|--------|-------|
|           |             | Total                     | BTL | CSM | FF | Total                       | LP | NLP | No CSM | No FF |
| Baseline  | 31          | 9                         | 4   | 1   | 4  | 35                          | 26 | 3   | 1      | 5     |
| 1 Month   | 21          | 6                         | 1   |     | 5  | 6                           | 2  | 4   |        |       |
| 3 Months  | 17          | 9                         | 4   |     | 5  | 10                          | 7  | 2   |        | 1     |
| 6 Months  | 13          | 13                        | 4   | 3   | 6  | 7                           | 6  | 1   |        |       |
| 12 Months | 10          | 15                        | 4   | 3   | 8  | 15                          | 11 | 3   |        | 1     |

VA: visual acuity; EUA: examination under anesthesia; BTL: blink to light; CSM: central-steady-maintained; FF: fix and follow; LP: light perception; NLP: no light perception
