# Supplementary material
Source: PubMed Central journal article supplement (PMC6510644)

Mean logMAR Visual Acuity and 95% CIs

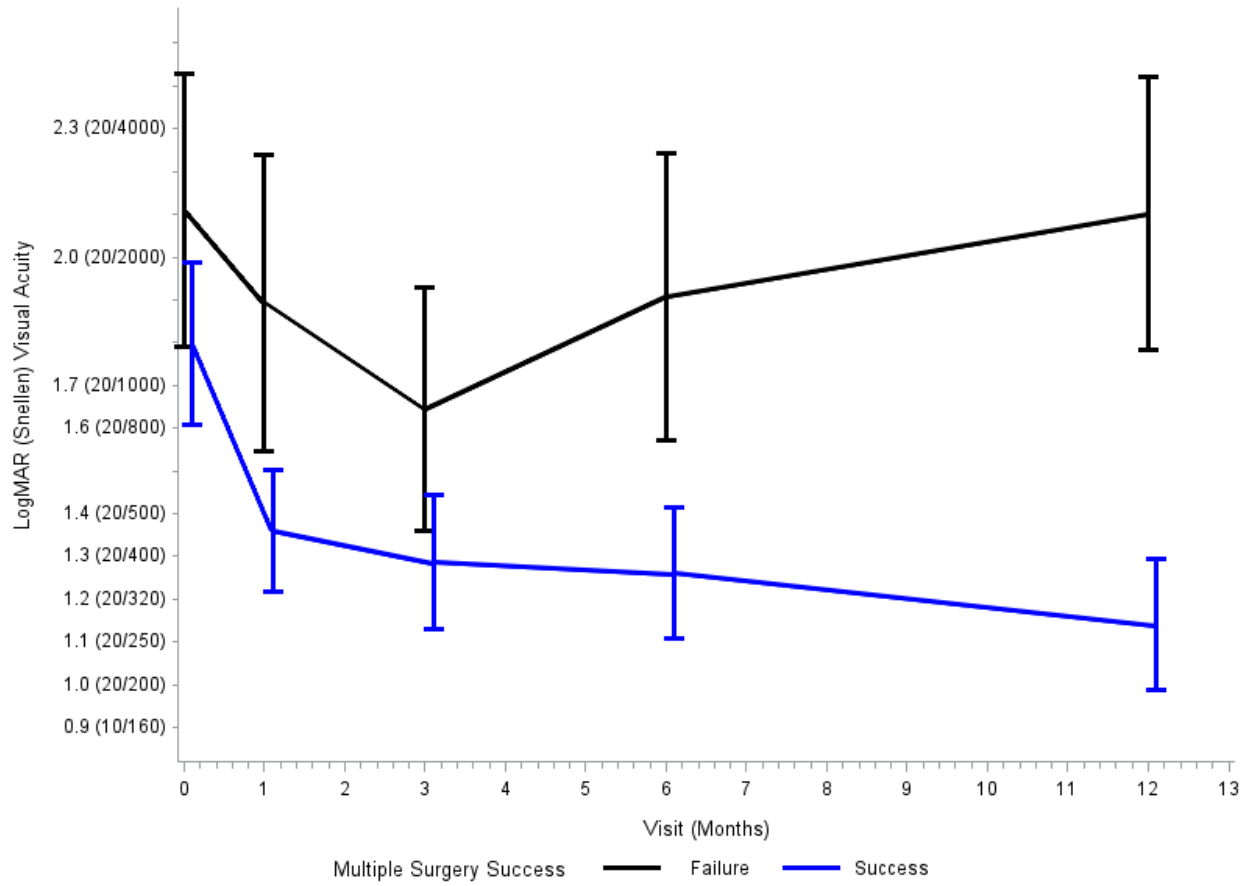

Supplement: NIHMS1512119-supplement-1.pdf [file NIHMS1512119-supplement-1.pdf]
